# Supplementary material for: Gender-specific differences in PPARγ regulation of follicular helper T cell responses with estrogen
Source: PubMed Central journal article supplement (PMC4917844; doi:10.1038/srep28495), 2016-06-23
Supplement: srep28495-s1.pdf [file srep28495-s1.pdf]

## **Supplementary Information**

### **Gender-specific differences in PPAR $\gamma$ regulation of follicular helper T cell responses with estrogen**

Hong-Jai Park<sup>1,2</sup>, Hyeon-Soo Park<sup>1,2</sup>, Jae-Ung Lee<sup>1,2</sup>, Alfred L. M. Bothwell<sup>3</sup>,  
Je-Min Choi<sup>1,2,\*</sup>

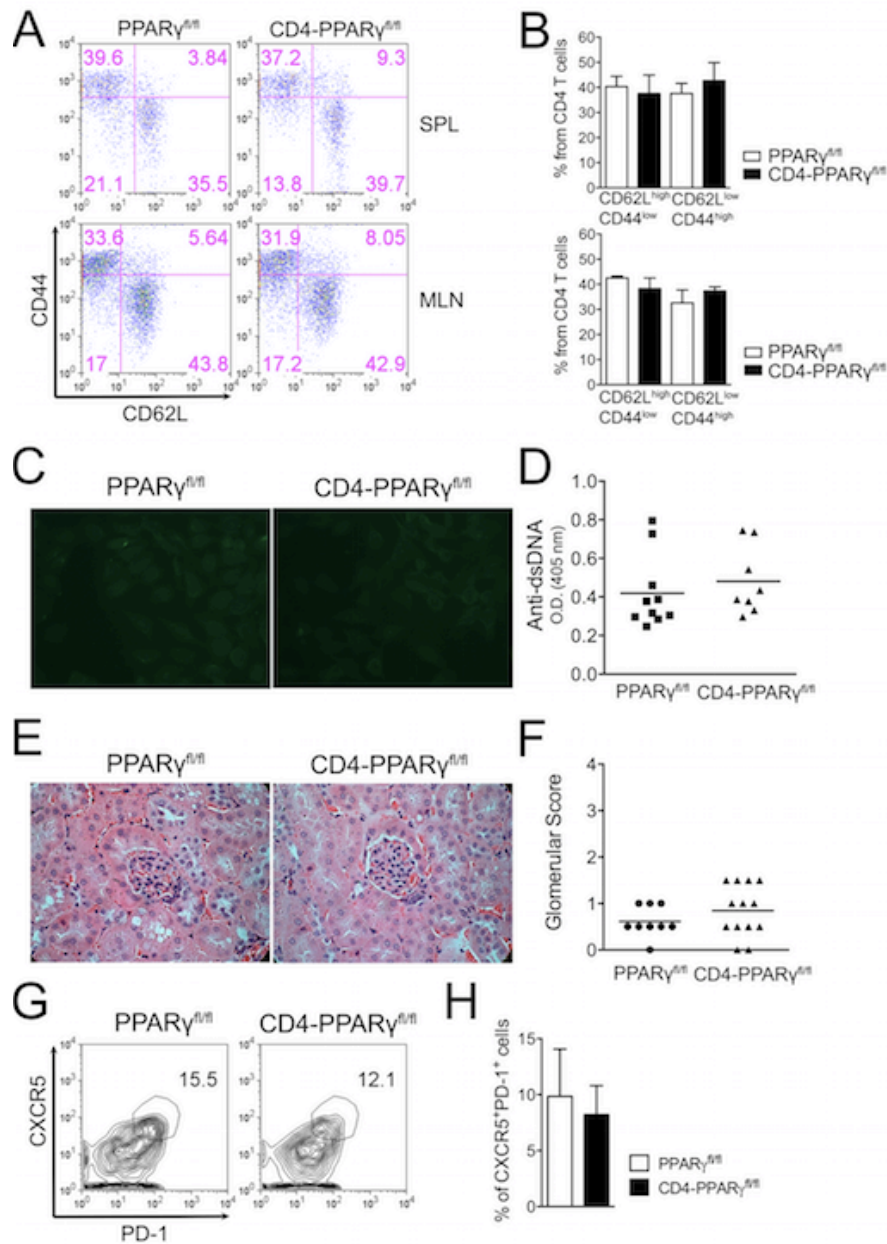

**Supplementary Figure S1. Male CD4-PPAR $\gamma^{KO}$  mice do not develop spontaneous autoimmune phenotypes.** (a) Spleens and mesenteric lymph nodes were isolated from 1-year-old littermate control and CD4-PPAR $\gamma^{KO}$  mice. The proportion of naïve (CD62L<sup>high</sup>CD44<sup>low</sup>) and activated (CD4+CD62L<sup>low</sup>CD44<sup>high</sup>) T cells gated on CD4-positive cells were examined by flow cytometry analysis. (b) The % of CD62L<sup>high</sup>CD44<sup>low</sup> and CD62L<sup>low</sup>CD44<sup>high</sup> T cells gated on CD4-positive cells were

indicated as a bar graph (n=4). **(c)** Spontaneous anti-nuclear antibody (ANA) production was analyzed in the serum of 6-month-old male littermate control and CD4-PPAR $\gamma$ <sup>KO</sup> mice. Pre-fixed NIH3T3 cells were stained with Alexa Fluor 488-conjugated anti-mouse Ig antibody following staining with diluted sera. **(d)** Anti-dsDNA antibody production was determined in the serum of 1-year-old male littermate control and CD4-PPAR $\gamma$ <sup>KO</sup> mice by ELISA. Each dot represents a single mouse (n=8-10). **(e)** Glomerular inflammation was analyzed by hematoxylin and eosin (H&E) staining of kidneys from 1-year-old male littermate control and CD4-PPAR $\gamma$ <sup>KO</sup> mice. **(f)** Glomerular inflammatory score was examined in 1-year-old male littermate control and CD4-PPAR $\gamma$ <sup>KO</sup> mice (n=9-13). **(g)** Spontaneous induction of T<sub>FH</sub> cells was analyzed in the spleen from 1-year-old male littermate control and CD4-PPAR $\gamma$ <sup>KO</sup> mice. **(h)** The % of PD-1<sup>+</sup>CXCR5<sup>+</sup> T<sub>FH</sub> cells was represented as a bar graph. Values shown are means  $\pm$  SEM (n=4).

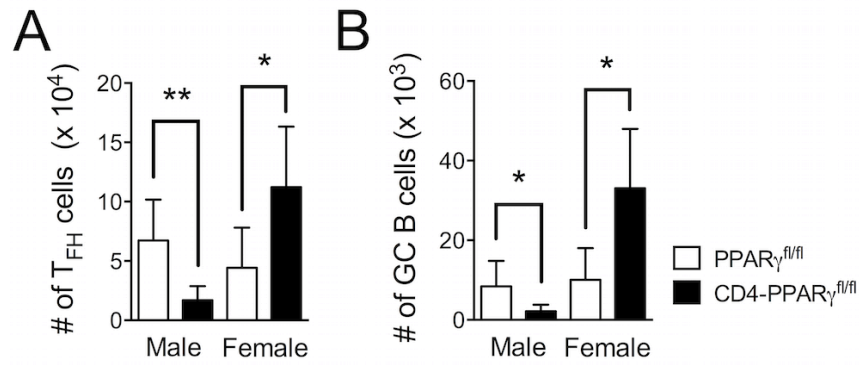

**Supplementary Figure S2. Male CD4-PPAR $\gamma^{KO}$  but not female mice have lower numbers of T<sub>FH</sub> and GC B cells.** T<sub>FH</sub> and GC B cells were induced by immunization of six- to eight-week-old male and female littermate control and CD4-PPAR $\gamma^{KO}$  mice with NP-OVA. Seven days after immunization, the numbers of T<sub>FH</sub> and GC B cells in lymph nodes were examined. **(a)** Bcl-6 and CXCR5 double-positive cells gated on CD4<sup>+</sup>CD44<sup>high</sup> were identified as T<sub>FH</sub> cells and the number of Bcl-6<sup>+</sup>CXCR5<sup>+</sup> T<sub>FH</sub> cells were analyzed. **(b)** The number of GL-7<sup>+</sup>CD95<sup>+</sup> GC B cells gated on B220-positive cells from lymph nodes was analyzed as GC B cells. The data represent means  $\pm$  SEM (n=4/group, three independent experiments). \* $P < 0.05$ , \*\* $P < 0.01$  by a two-tailed, unpaired Student's *t*-test.

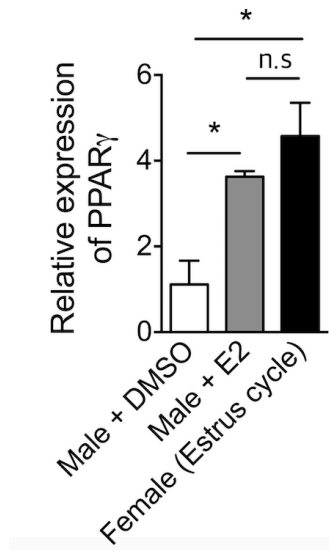

**Supplementary Figure S3. In vivo administration of E2 results in increased PPAR $\gamma$  mRNA expression in male mice.** Six- to eight-week-old male C57BL/6 mice were administrated with DMSO and 60  $\mu$ g of E2, once a day from day 1 to day 6 and spleens were isolated from the mice at day 7. Menstrual cycle was monitored in six- to eight-week-old female C57BL/6 mice and splenocytes were isolated from the mice at estrus stage. Total RNA was isolated from the splenocytes and the expression level of PPAR $\gamma$  was determined using real-time PCR and was normalized to  $\beta$ -actin. The data shown represent means  $\pm$  SEM (n=2~3, two independent experiments). \* $P$  < 0.05 by a two-tailed, unpaired Student's  $t$ -test.

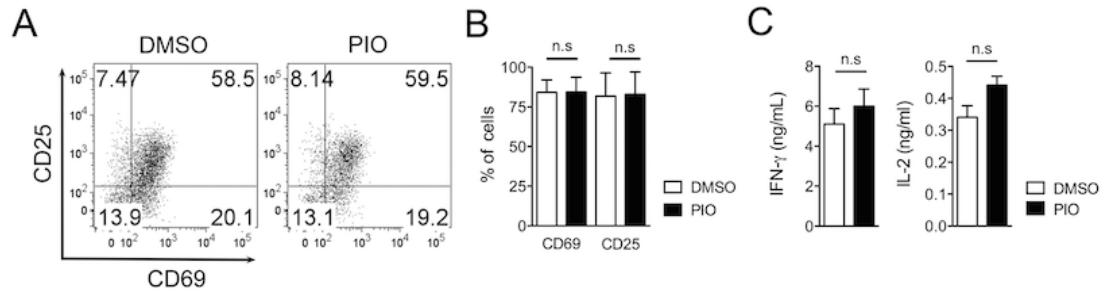

**Supplementary Figure S4. Pioglitazone does not affect T cell activation in male cells.** Splenocytes were isolated from six- to eight-week-old male mice and stimulated with anti-CD3 and anti-CD28 for 24 h in the presence of DMSO or pioglitazone. (a, b) CD69 and CD25 expression gated on CD4-positive cells were analyzed with flow cytometry and the % of CD69- and CD25-positive cells was represented as a bar graph (n=6). (c) IFN- $\gamma$  and IL-2 cytokine production levels following TcR stimulation were analyzed by ELISA using cultured supernatant (n=6).

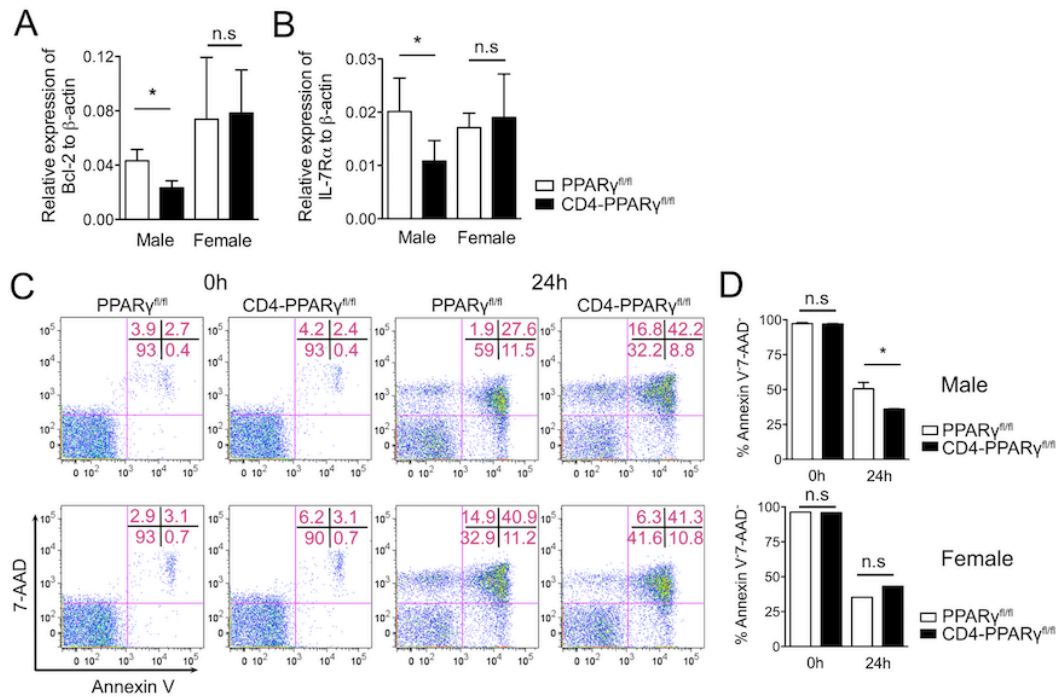

**Supplementary Figure S5. Male PPAR $\gamma$ -deficient T cells are apoptotic following TcR stimulation.** Naïve T cells (CD4<sup>+</sup>CD62L<sup>high</sup>) were purified from the spleens of male littermate control and CD4-PPAR $\gamma^{KO}$  mice and were stimulated with anti-CD3 and anti-CD28 antibodies for 3 days. (a,b) Expression levels of Bcl-2 and IL-7R $\alpha$  in anti-CD3- and anti-CD28-stimulated male and female T cells from littermate control and CD4-PPAR $\gamma^{KO}$  mice were analyzed with real-time PCR and normalized to  $\beta$ -actin (n=4). (c,d) Naïve T cells were purified from the spleens of male and female littermate control and CD4-PPAR $\gamma^{KO}$  mice. The cells were incubated in serum depleted RPMI media overnight and proportion of live cells (Annexin V<sup>-</sup>7-AAD<sup>-</sup>) was examined by flow cytometry analysis. The % of Annexin V<sup>-</sup>7-AAD<sup>-</sup> live cells gated on CD4-positive cells. Values shown are means  $\pm$  SEM (n=3), \* $P < 0.05$ .
